# Supplementary material for: De Novo SNP Discovery and Genotyping of Iranian Pimpinella Species Using ddRAD Sequencing
Source: MDPI journal article supplement (doi:10.3390/agronomy11071342), 2021-06-30
Supplement: s1 [file s1]

Table S2 Population statistics calculated using populations (STACKS) for *de novo* mapping and reference mapping (refmap). The parameters for M and n were tested for all values 3-6 with all other parameters constant.

| M, n | Sites   | #Sites    | Variant Sites | Polymorphic Sites | %Polymorphic Loci | Obs Het | Obs Hom | Exp Het | Exp Hom | Pi      | Fis     |
|------|---------|-----------|---------------|-------------------|-------------------|---------|---------|---------|---------|---------|---------|
| 3    | Variant | -         | -             | -                 | -                 | 0.67464 | 0.32536 | 0.48628 | 0.51372 | 0.81353 | 0.22077 |
|      | All     | 311940625 | 625507        | 625507            | 0.20052           | 0.00135 | 0.99865 | 0.00098 | 0.99902 | 0.00163 | 0.00044 |
| 4    | Variant | -         | -             | -                 | -                 | 0.61975 | 0.38025 | 0.48479 | 0.51521 | 0.79529 | 0.27962 |
|      | All     | 299571207 | 683674        | 683674            | 0.22822           | 0.00141 | 0.99859 | 0.00111 | 0.99889 | 0.00181 | 0.00064 |
| 5    | Variant | -         | -             | -                 | -                 | 0.57126 | 0.42874 | 0.48315 | 0.51685 | 0.77829 | 0.33198 |
|      | All     | 290983440 | 746077        | 746077            | 0.2564            | 0.00146 | 0.99854 | 0.00124 | 0.99876 | 0.002   | 0.00085 |
| 6    | Variant | -         | -             | -                 | -                 | 0.52977 | 0.47023 | 0.48143 | 0.51857 | 0.76334 | 0.37786 |
|      | All     | 284504386 | 811993        | 811993            | 0.28541           | 0.00151 | 0.99849 | 0.00137 | 0.99863 | 0.00218 | 0.00108 |
