# Supplementary material for: De Novo SNP Discovery and Genotyping of Iranian Pimpinella Species Using ddRAD Sequencing
Source: MDPI journal article supplement (doi:10.3390/agronomy11071342), 2021-06-30
Supplement: s1 [file s1]

Table S3. Population statistics calculated using populations (STACKS) for *de novo* mapping (-M 3 -n 3).

| <b>M,n</b> | <b>Sites</b>   | <b>Sites</b> | <b>Variant<br/>Sites</b> | <b>Polymorphic<br/>Sites</b> | <b>%Polymorphic<br/>Loci</b> | <b>Obs<br/>Het</b> | <b>Obs<br/>Hom</b> | <b>Exp<br/>Het</b> | <b>Exp<br/>Hom</b> | <b>Pi</b> | <b>Fis</b> |
|------------|----------------|--------------|--------------------------|------------------------------|------------------------------|--------------------|--------------------|--------------------|--------------------|-----------|------------|
| <b>3</b>   | <i>Variant</i> | -            | -                        | -                            | -                            | 0.67464            | 0.32536            | 0.48628            | 0.51372            | 0.81353   | 0.22077    |
|            | <i>All</i>     | 311940625    | 625507                   | 625507                       | 0.20052                      | 0.00135            | 0.99865            | 0.00098            | 0.99902            | 0.00163   | 0.00044    |
